# Supplementary material for: Hierarchical 3D structured nanoporous Co9S8@Nix:Moy–Se core–shell nanowire array electrodes for high-performance asymmetric supercapacitors
Source: Royal Society of Chemistry journal article supplement (doi:10.1039/d1ta08742h), 2021-01-01
Supplement: d1ta08742h1.pdf [file d1ta08742h1.pdf]

## Supplementary Information

### Hierarchically 3D Nanoporous Structured $\text{Co}_9\text{S}_8@\text{Ni}_x\text{Mo}_y\text{-Se}$ Core-shell Nanowire Arrays Electrode for the High-performance Asymmetric Supercapacitor

*JiuYi Dai<sup>a</sup>, Soram Bobby Singh<sup>a</sup>, Nam Hoon Kim<sup>a</sup> and Joong Hee Lee<sup>a,b\*</sup>*

<sup>a</sup> Department of Nano Convergence Engineering, Jeonbuk National University, Jeonju, Jeonbuk, 54896,  
Republic of Korea.

<sup>b</sup> Carbon Composite Research Center, Department of Polymer-Nano Science and Technology, Jeonbuk National  
University, Jeonju, Jeonbuk, 54896, Republic of Korea.

*\*Corresponding authors:*

Email address: [jhl@jbnu.ac.kr](mailto:jhl@jbnu.ac.kr) (Prof. Joong Hee Lee) Fax: +82 632702341; Tel: +82 632702342

### **Synthesis of Fe<sub>2</sub>O<sub>3</sub>@ PANNFs@N-rGO Aerogel:**

GO, and PAN Nanofibers(NFs) were synthesized by the previous method<sup>1, 2</sup>. Fe<sub>2</sub>O<sub>3</sub>@PAN NFs@N-rGO hydrogel was prepared using the following detailed procedure: Briefly, 50 mg GO was dispersed into 10 mL DI water with ultrasonication for 2 h. And 50mg PAN NFs was dispersed into 10 mL DI water with ultrasonication for 2 h. then the GO solution was mixed with PAN NFs solution by stir 30 mins. 0.5mmol FeCl<sub>3</sub>·6H<sub>2</sub>O was dissolved into 5 mL DI water separately. Then, the iron precursor solution and 2 ml NH<sub>3</sub>·H<sub>2</sub>O (28%) were added dropwise into the GO and PAN NFs suspension under vigorous stirring. The mixture was vigorously stirred for another 1h at room temperature. Subsequently, the mixture was transferred into a 50 mL Teflon-lined stainless-steel autoclave. The autoclave was sealed, maintained at 180 °C for 12 h, and then slowly cooled down to the room temperature naturally. The black cylinder hydrogel was carefully fetched out and put into DI water to dialyzing for 12 h. After that, the dried Fe<sub>2</sub>O<sub>3</sub>@PANNFs/N-rGO cylinder hydrogel was obtained by freeze-drying.

### **Fabrication of aqueous asymmetric supercapacitors (ASCs):**

Typically, the aqueous ASC consisted of the NKK TF40 (thickness: 40 μm; Nippon Kodoshi Corporation) as the separator of two pieces of electrode materials (size:10 mm × 10 mm) aqueous 2 M KOH solution as the electrolyte.

In the aqueous ASCs system, the self-supported Fe<sub>2</sub>O<sub>3</sub>@PANNFs/N-rGO hydrogels were used as the negative materials, and the as-synthesized Co<sub>9</sub>S<sub>8</sub>@Ni<sub>0.5</sub>Mo<sub>0.5</sub>-Se NWAs were used as the positive materials. To realize a high electrochemical property for Co<sub>9</sub>S<sub>8</sub>@Ni<sub>0.5</sub>Mo<sub>0.5</sub>-Se // Fe<sub>2</sub>O<sub>3</sub>@PANNFs/N-rGO ASC, we optimized the mass ratio of the Co<sub>9</sub>S<sub>8</sub>@Ni<sub>0.5</sub>Mo<sub>0.5</sub>-Se NWAs to Fe<sub>2</sub>O<sub>3</sub>@PANNFs/N-rGO around~ 0.43 and the working voltage window of the device to ~

1.7 V. The optimal mass ratio of positive materials to negative materials was counted by Equation (5).

#### **Fabrication of solid-state asymmetric supercapacitors:**

The electrochemical performance of all-solid-state ASC was measured under a two-electrode system, which included two slices of electrode material with the same size (10 mm × 10 mm), PVA/KOH film as a separator, and KOH/PVA solid-gel as solid-state electrolyte. In the two-electrode system,  $\text{Co}_9\text{S}_8@\text{Ni}_{0.5}\text{Mo}_{0.5}\text{-Se}$  NWAs grown 3D porous Ni foam was used as the positive electrode, and  $\text{Fe}_2\text{O}_3@\text{PANNFs/N-rGO}$  coated on Ni foam was used as the negative electrode. The KOH/PVA gel electrolyte was prepared using the following procedure: 2 g KOH and 2 g PVA ( $M_w = 98000$ ) were dissolved in 22 mL DI water and then heated at 95 °C for 2 h under vigorous stirring. The electrodes and separator were soaked in the electrolyte for 10 min. and then allowed to solidify the sample by freeze and unfreeze repeatedly.

#### **Materials characterization**

The field-emission scanning electron microscope (FE-SEM; SUPRA 40 VP; Carl Zeiss, Germany) was used to characterize the surface morphology of the as-synthesized materials. The EDAX analysis (SUPRA 40 VP; Carl Zeiss, Germany) was used to investigate the quantity of the elemental composition of the as-obtained materials. The transmission electron microscopy (TEM) and high-resolution TEM (HR-TEM; H-7650; Hitachi Ltd., Japan) were used to examine the intrinsic morphology of the as-synthesized electrode material. The STEM-energy dispersive X-ray spectroscopy (EDS) mapping was used to analyze the elemental distribution of the as-obtained electrode materials. We examined the crystallinity of the as-synthesized materials by X-ray diffraction (XRD) (Rigaku Corporation, Japan, Cu  $K\alpha$  radiation ( $\lambda = 0.154$

nm)). The theta probe AR-XPS system (Thermo Fisher Scientific, UK) was used to investigate the elemental compositions and valence states of the as-obtained electrode material. The N<sub>2</sub> sorption isotherms analysis was used to measure the SSA and the pore-size distribution of the as-obtained electrode material (at 77K; Micromeritics ASAP 2020).

### **Electrochemical measurement**

The electrochemical workstation (CHI660D, CH Instruments, Inc., USA) was used to study the electrochemical properties of materials under a three-electrode configuration system. The aqueous 2 M KOH solution was used as the electrolyte. In a three-electrode configuration system, the Pt foil was used as counter electrodes, the Ag/AgCl/3.0 mol/kg KCl was used as the reference electrode, and the as-obtained pristine Co<sub>9</sub>S<sub>8</sub>, Co<sub>9</sub>S<sub>8</sub>@MoSe, Co<sub>9</sub>S<sub>8</sub>@Ni<sub>0.5</sub>Mo<sub>0.5</sub>-Se, Co<sub>9</sub>S<sub>8</sub>@Ni<sub>0.25</sub>Mo<sub>0.75</sub>-Se, and Co<sub>9</sub>S<sub>8</sub>@Ni<sub>0.75</sub>Mo<sub>0.25</sub>-Se electrodes were directly used as the working electrode. The mass loading for the Co<sub>9</sub>S<sub>8</sub>, Co<sub>9</sub>S<sub>8</sub>@Ni<sub>0.5</sub>Mo<sub>0.5</sub>-Se, Co<sub>9</sub>S<sub>8</sub>@Ni<sub>0.25</sub>Mo<sub>0.75</sub>-Se, Co<sub>9</sub>S<sub>8</sub>@Ni<sub>0.75</sub>Mo<sub>0.25</sub>-Se, and Co<sub>9</sub>S<sub>8</sub>@MoSe electrodes are 1.5 mg cm<sup>-2</sup>, 2.0 mg cm<sup>-2</sup>, 2.0 mg cm<sup>-2</sup>, 2.1 mg cm<sup>-2</sup>, and 2.2 mg cm<sup>-2</sup>, respectively. The electrochemical impedance spectroscopy (EIS) test was examined by using a 5 mV amplitude with a frequency range from 0.01 Hz to 100 kHz.

### **Calculations**

The areal capacity ( $C_{ac}$ , mAh cm<sup>-2</sup>) and the specific capacity ( $C_{sc}$ , mAh g<sup>-1</sup>) of the as-obtained materials under the three-electrode configuration system and the ASC device were counted from general charge and discharge (GCD) curves using the following Equations Eqs.S (1) and Eqs.S (2)<sup>3,4</sup>:

$$C_{ac} = \frac{2I \times \int Vdt}{AV} \quad (1)$$

$$C_{sc} = \frac{2I \times \int Vdt}{mV} \quad (2)$$

Where the "I" (mA) is the current of the system during the discharge process, the "A" (cm<sup>2</sup>) is the area of the active electrode, the "m" (g) is the mass of the active electrode material, and the "∫Vdt" is the absolutely integral area of the GCD curve (discharge process). The energy densities (E, Wh kg<sup>-1</sup>) and the power densities (P, W kg<sup>-1</sup>) of the assembled ASC device were calculated using the following Equations Eqs.S (3) and Eqs.S (4)<sup>5</sup>:

$$E = \frac{I \times \int Vdt}{m \times 3.6} \quad (3)$$

$$P = \frac{E}{t} \times 3600 \quad (4)$$

Where the "I" (mA) is the current of the ASC device, the "∫Vdt" is the absolutely integral area of the GCD curve (discharge part), the "m" (g) is the mass of the material (active electrode), and "t" is the discharge time. The mass ratio of the Co<sub>9</sub>S<sub>8</sub>@Ni<sub>0.5</sub>Mo<sub>0.5</sub>-Se (positive) and Fe<sub>2</sub>O<sub>3</sub>@PANNFs/N-rGO (negative) materials were counted by Equation Eqs.S(5)<sup>4</sup>:

$$\frac{m_+}{m_-} = \frac{C_- \times V_-}{C_+ \times V_+} \quad (5)$$

where the "m<sup>-</sup>" is the negative materials mass, the "m<sup>+</sup>" is the positive materials mass; the "C<sup>-</sup>" is the specific capacity (negative materials), the "C<sup>+</sup>" is the specific capacity (positive materials); and "V" is the working voltage widow for the negative (-) and positive (+) materials.

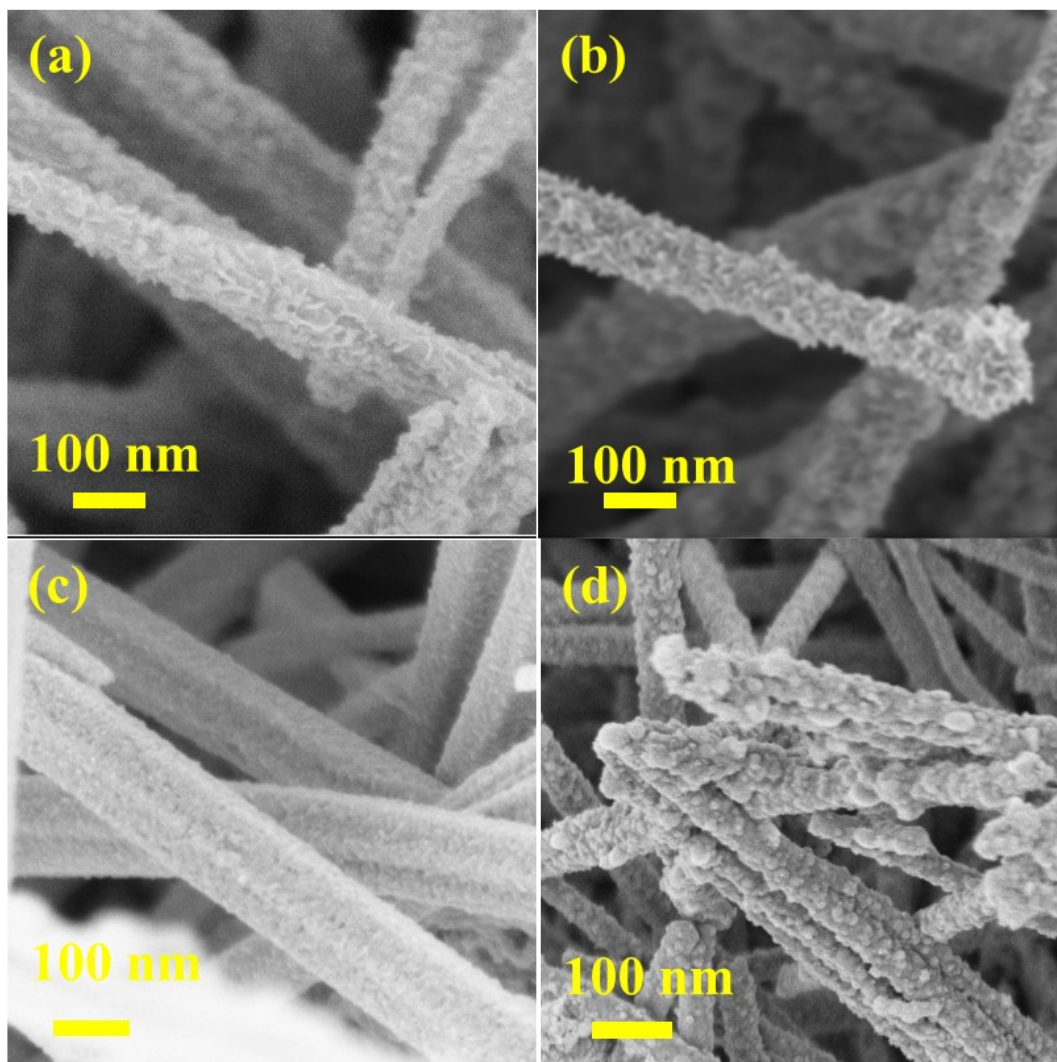

**Fig. S1** FE-SEM image of as-synthesized (a)  $\text{Co}_9\text{S}_8@\text{MoSe}$ , (b)  $\text{Co}_9\text{S}_8@\text{Ni}_{0.5}\text{Mo}_{0.5}\text{-Se}$ , (c)  $\text{Co}_9\text{S}_8@\text{Ni}_{0.25}\text{Mo}_{0.75}\text{-Se}$  and  $\text{Co}_9\text{S}_8@\text{Ni}_{0.75}\text{Mo}_{0.25}\text{-Se}$ .

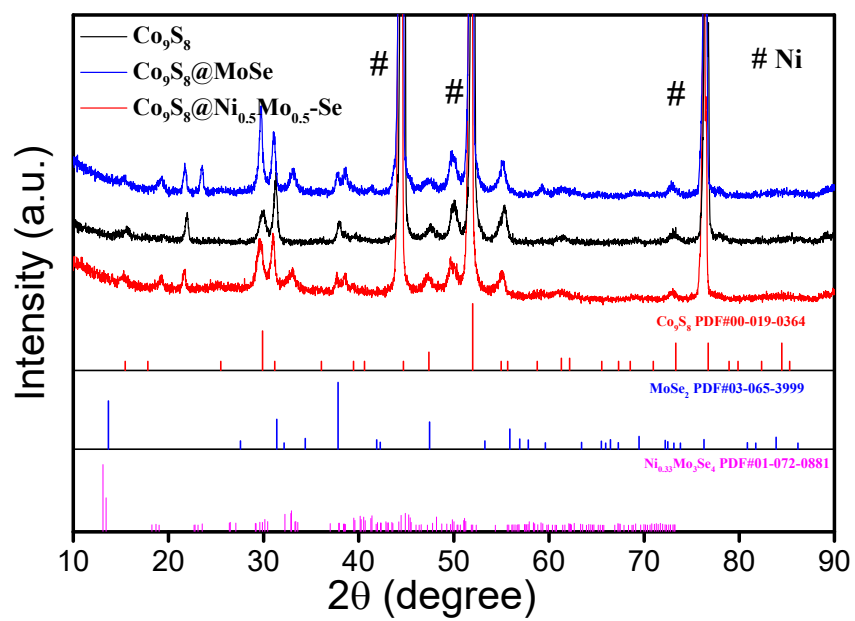

**Fig. S2.** XRD spectrum of as-synthesized  $\text{Co}_9\text{S}_8$ ,  $\text{Co}_9\text{S}_8@\text{MoSe}$ , and  $\text{Co}_9\text{S}_8@\text{Ni}_{0.5}\text{Mo}_{0.5}\text{-Se}$ .

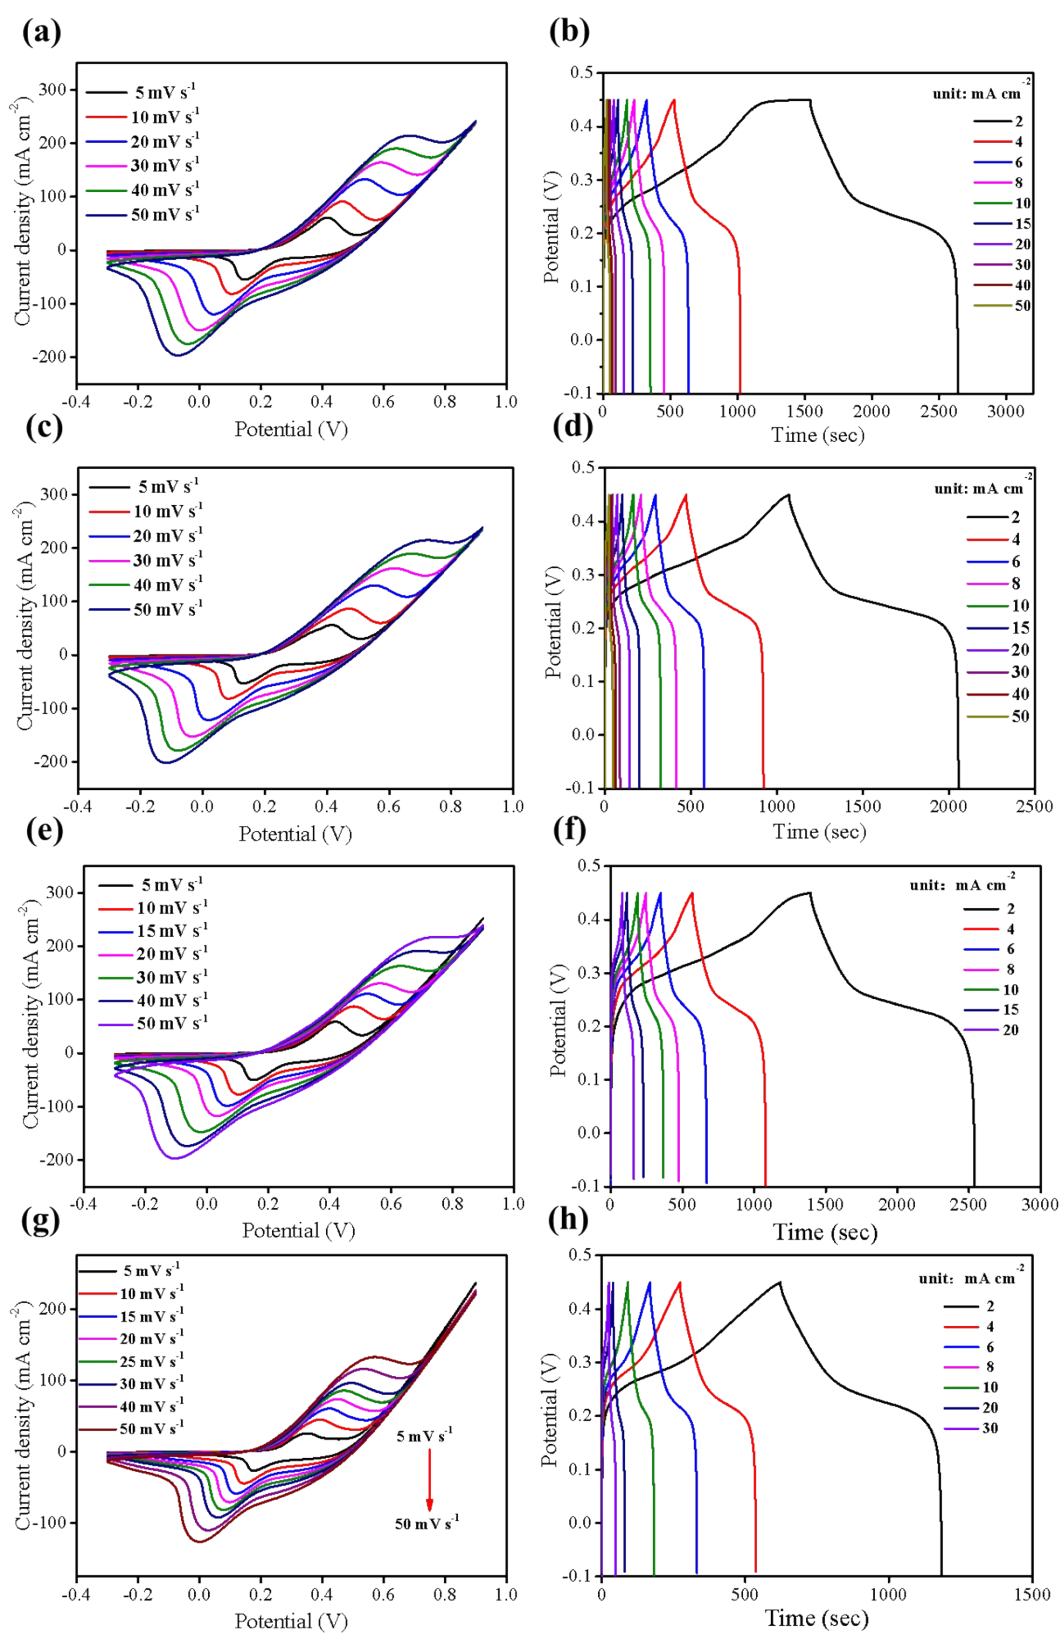

**Fig. S3.** CV and GCD curves of: (a-b)  $\text{Co}_9\text{S}_8@\text{Ni}_{0.25}\text{Mo}_{0.75}\text{Se}$ , (c-d)  $\text{Co}_9\text{S}_8@\text{Ni}_{0.25}\text{Mo}_{0.75}\text{Se}$ , (e-f)

$\text{Co}_9\text{S}_8@\text{MoSe}$ , (g-h) bare  $\text{Co}_9\text{S}_8$ .



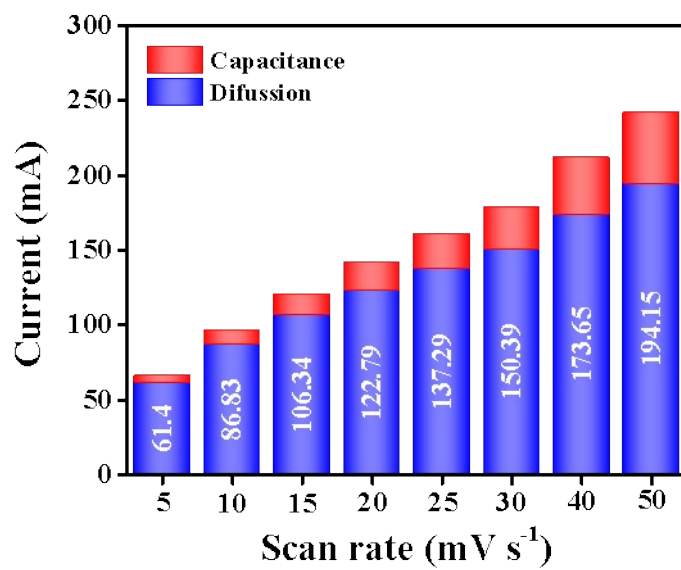

**Fig. S4.** Surface-controlled and diffusion controlled capacity contribution of

Co<sub>9</sub>S<sub>8</sub>@Ni<sub>0.5</sub>:Mo<sub>0.5</sub>-Se

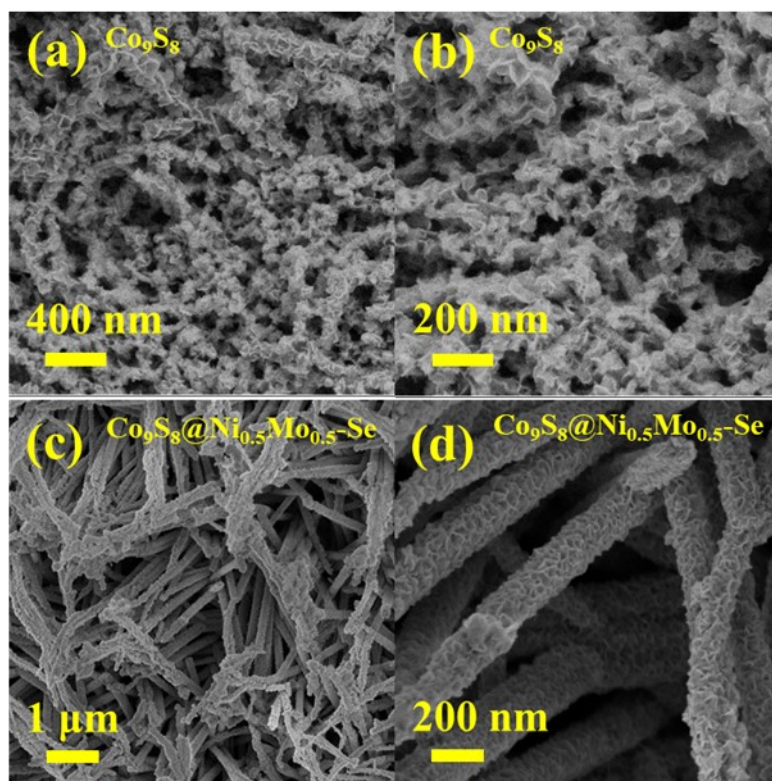

**Fig. S5.** FE-SEM image of  $\text{Co}_9\text{S}_8$  NWs (a-b) and  $\text{Co}_9\text{S}_8@ \text{Ni}_{0.5}\text{Mo}_{0.5}\text{Se}$  NWAs(c-d) after the cycling test

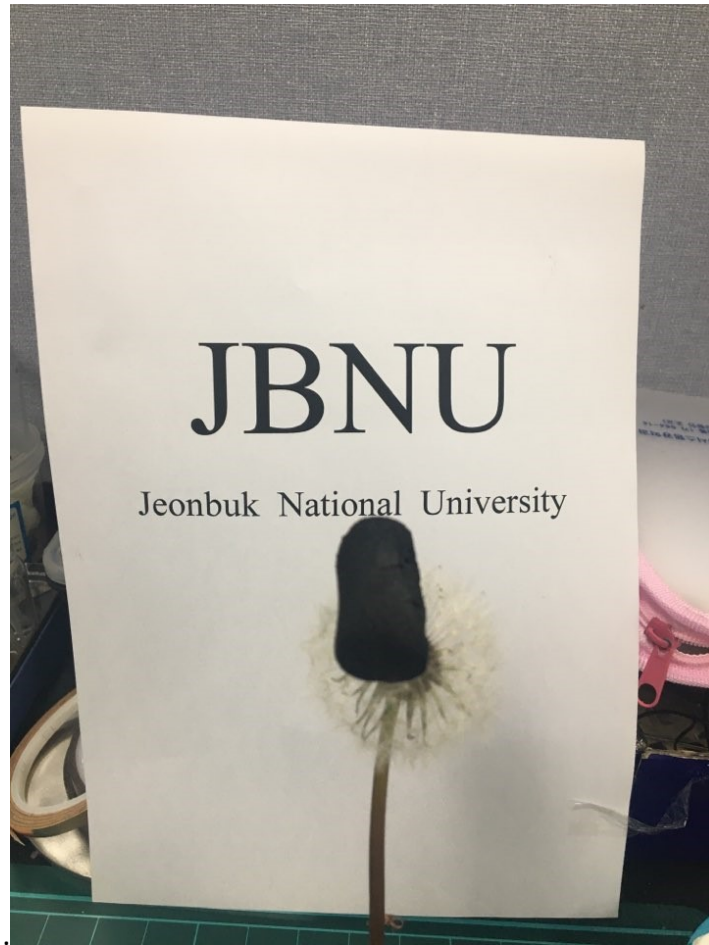

**Fig. S6.** Digital photograph of a cylindrical shape  $\text{Fe}_2\text{O}_3@\text{PANNFs}/\text{N-rGO}$  aerogel held free-standing on the top of a dandelion demonstrating its ultra-lightness.

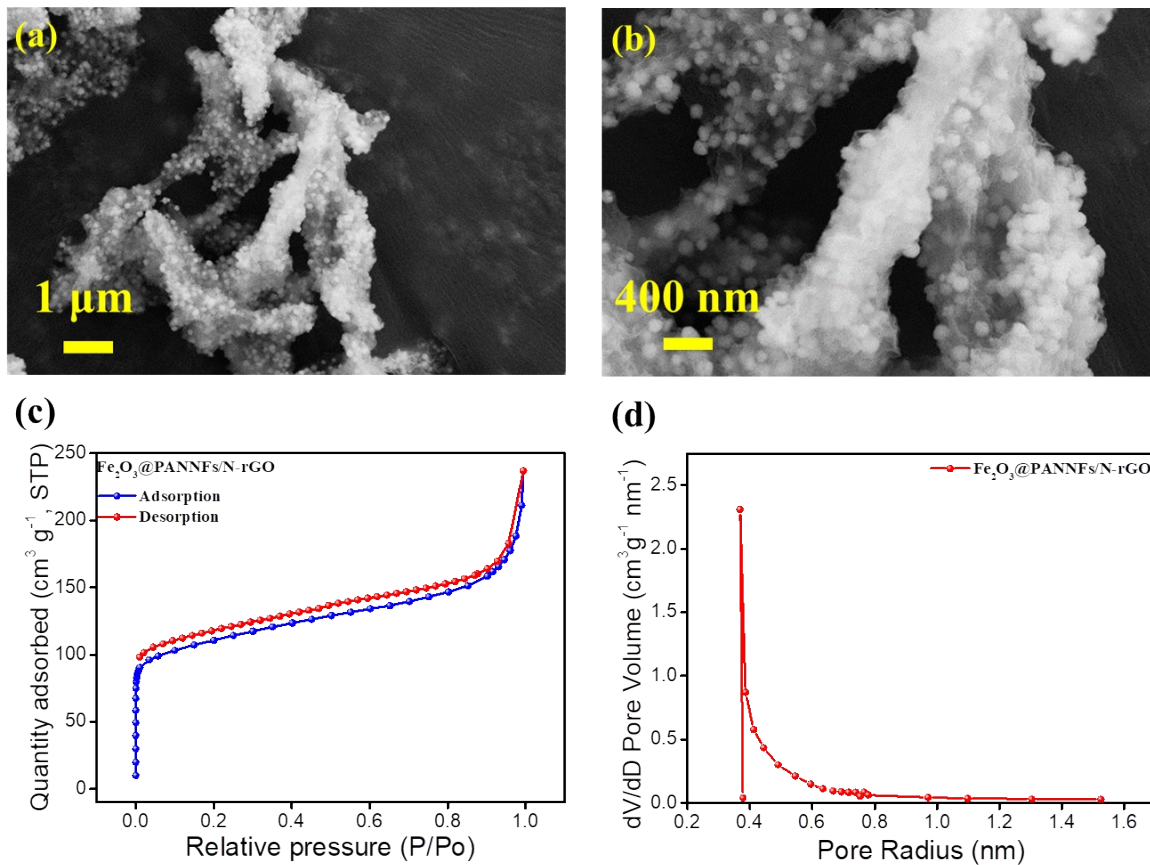

**Fig. S7.** (a, b) FE-SEM of Fe<sub>2</sub>O<sub>3</sub>@PANNFs/N-rGO at different magnifications, (c) N<sub>2</sub> sorption isotherms, and (d) pore size distribution of the Fe<sub>2</sub>O<sub>3</sub>@PANNFs/N-rGO.

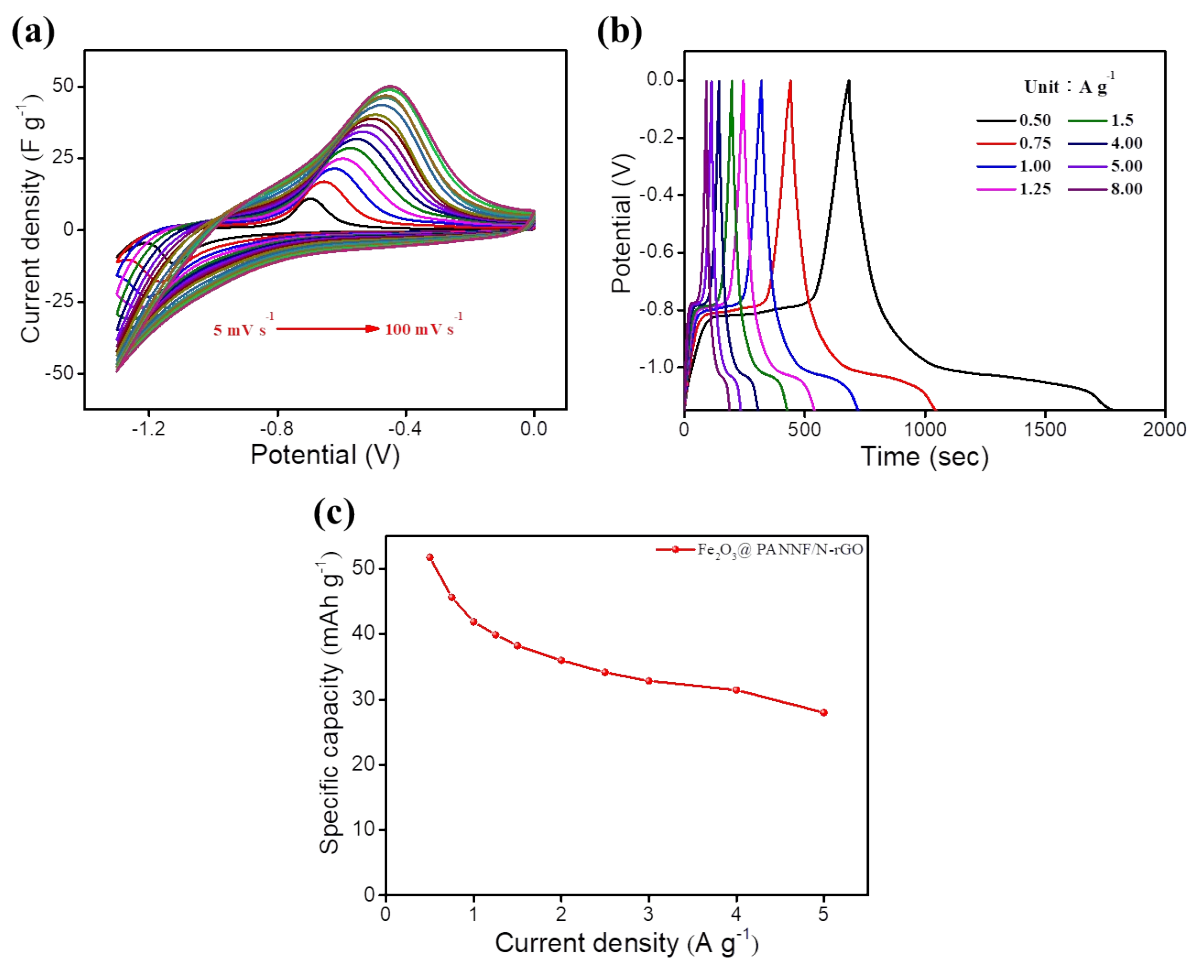

**Fig. S8.** (a) CV curves of the Fe<sub>2</sub>O<sub>3</sub>@PANNFs/N-rGO at different scan rate. (b) The GCD curves of the Fe<sub>2</sub>O<sub>3</sub>@PANNFs/N-rGO at different current density. (e) The specific capacity vs. current density of Fe<sub>2</sub>O<sub>3</sub>@PANNFs/N-rGO;

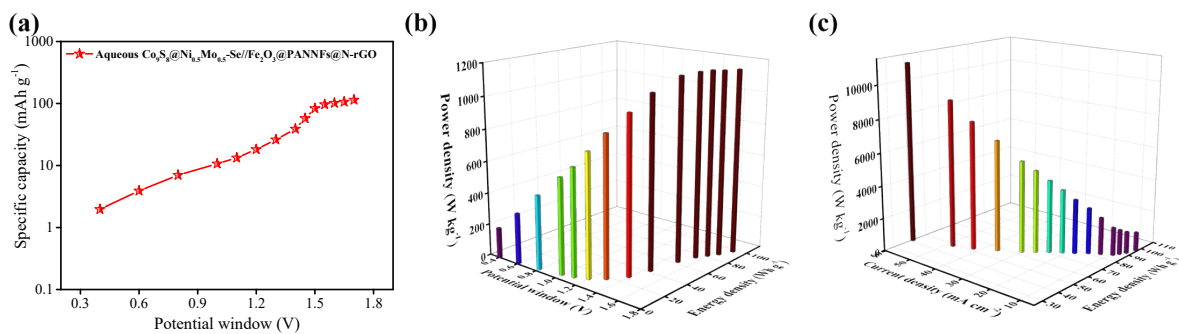

**Fig. S9.** (a) The specific capacity vs. operating voltage windows of  $\text{Co}_9\text{S}_8@\text{Ni-Mo-Se}//\text{Fe}_2\text{O}_3@\text{PANNFs/N-rGO}$  ASC. (b) 3D Bar plots (energy density vs. power density vs. operating voltage windows) of  $\text{Co}_9\text{S}_8 @ \text{Ni-Mo-Se}//\text{Fe}_2\text{O}_3 @ \text{PANNFs/N-rGO}$  aqueous ASC. (c) 3D Bar plots (energy density vs. power density vs. current density) of  $\text{Co}_9\text{S}_8@\text{Ni-Mo-Se}//\text{Fe}_2\text{O}_3@\text{PANNFs/N-rGO}$  aqueous ASC

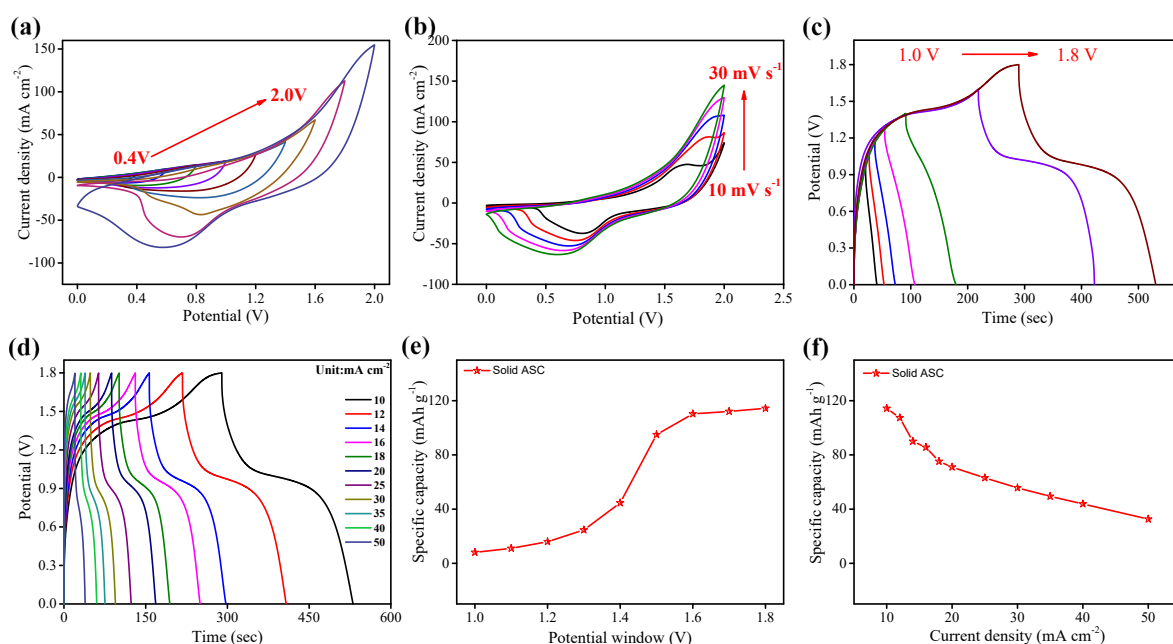

**Fig. S10.** (a) CV curves (scan rate  $50 \text{ mV s}^{-1}$ ) of all-solid-state  $\text{Co}_9\text{S}_8@\text{Ni}_{0.5}\text{Mo}_{0.5}\text{-Se//Fe}_2\text{O}_3@\text{PANNFs/N-rGO}$  ASC at various operating voltage windows. (b) CV curves of all-solid-state  $\text{Co}_9\text{S}_8@\text{Ni}_{0.5}\text{Mo}_{0.5}\text{-Se//Fe}_2\text{O}_3@\text{PANNFs/N-rGO}$  ASC at various sweep rates from  $10\text{--}50 \text{ mV s}^{-1}$ . (c) GCD curves of all-solid-state  $\text{Co}_9\text{S}_8@\text{Ni}_{0.5}\text{Mo}_{0.5}\text{-Se//Fe}_2\text{O}_3@\text{PANNFs/N-rGO}$  aqueous ASC at various operating voltage windows. (d) The specific capacity vs. operating voltage windows of  $\text{Co}_9\text{S}_8@\text{Ni}_{0.5}\text{Mo}_{0.5}\text{-Se//Fe}_2\text{O}_3@\text{PANNFs/N-rGO}$  aqueous ASC. (e) GCD curves of all-solid-state  $\text{Co}_9\text{S}_8@\text{Ni}_{0.5}\text{Mo}_{0.5}\text{-Se//Fe}_2\text{O}_3@\text{PANNFs/N-rGO}$  ASC at various current densities from  $10$  to  $50 \text{ mA cm}^{-2}$ . (f) The specific capacity vs. current density of all-solid-state  $\text{Co}_9\text{S}_8@\text{Ni}_{0.5}\text{Mo}_{0.5}\text{-Se // Fe}_2\text{O}_3@\text{PANNFs/N-rGO}$  ASC;

**Table S1.** Electrode properties comparison with reported literatures.

| Electrode Materials                                        | Areal Capacitance / capacity    | Specific capacitance /capacity  | Current load                  | Electrolyte    | Stability (Cycles)   | Ref.             |
|------------------------------------------------------------|---------------------------------|---------------------------------|-------------------------------|----------------|----------------------|------------------|
| CoNi <sub>2</sub> S <sub>4</sub> /SNGA                     | -                               | 318.3 mAh g <sup>-1</sup>       | 1 A g <sup>-1</sup>           | 6 M KOH        | 95.8% (10000)        | [6]              |
| Ni-Co-S/G                                                  | -                               | 1492 F g <sup>-1</sup>          | 1 A g <sup>-1</sup>           | 6 M KOH        | 90% (8000)           | [7]              |
| VACNTF@MoSe                                                | -                               | 435 F·g <sup>-1</sup>           | 1 A g <sup>-1</sup>           | 2 M KOH        | 92% (5000)           | [8]              |
| MoSe <sub>2</sub> /graphene Nanosheet                      | -                               | 945 F·g <sup>-1</sup>           | 1 A g <sup>-1</sup>           | 6 M KOH        | 92% (2000)           | [9]              |
| CoSe Nanosheet                                             | -                               | 70.6 mAh g <sup>-1</sup>        | 1 A g <sup>-1</sup>           | 2M KOH         | -                    | [10]             |
| NiSe@MoSe <sub>2</sub> Nanosheet                           | -                               | 128.2 mAh g <sup>-1</sup>       | 1 A g <sup>-1</sup>           | 2 M KOH        | 93.7% (1000)         | [11]             |
| CoSe <sub>2</sub> /Ni <sub>0.85</sub> Se Nanotube          | -                               | 171 mAh g <sup>-1</sup>         | 1.9 A g <sup>-1</sup>         | 6 M KOH        | 95.3% (6000)         | [12]             |
| MoSe <sub>2</sub> -Ni(OH) <sub>2</sub> Nanosheet           | -                               | 146.9 mAh g <sup>-1</sup>       | 1 A g <sup>-1</sup>           | 6 M KOH        | 90% (3000)           | [13]             |
| CoSe <sub>2</sub> /MoSe <sub>2</sub> Hollow Nanosphere     | -                               | 211.97 mAh g <sup>-1</sup>      | 1 A g <sup>-1</sup>           | 3 M KOH        | 94.2% (2000)         | [14]             |
| Co-Mo-Se Nanosheet arrays                                  | -                               | 221.7 mAh g <sup>-1</sup>       | 1 A g <sup>-1</sup>           | 6 M KOH        | 95% (8000)           | [15]             |
| Ni <sub>3</sub> S <sub>2</sub> @PPy                        | 3148 mF cm <sup>-2</sup>        | -                               | 2 mA cm <sup>-2</sup>         | 2 M KOH        | 91.2% (4000)         | [16]             |
| Ni <sub>3</sub> S <sub>2</sub> -Cu <sub>1.8</sub> S NS     | -                               | 1686 F g <sup>-1</sup>          | 1 A g <sup>-1</sup>           | 2 M KOH        | 88.94% (10000)       | [17]             |
| ZnCo <sub>2</sub> O <sub>4</sub>                           | 3.07 F·cm <sup>-2</sup>         | -                               | 1.04mA cm <sup>-2</sup>       | 6 M KOH        | 78.85% (3000)        | [18]             |
| peptide-Co <sub>9</sub> S <sub>8</sub>                     | 1300 mF cm <sup>-2</sup>        | 1800 F g <sup>-1</sup>          | 0.7mA cm <sup>-2</sup>        | 1 M KOH        | 96% (5000)           | [19]             |
| MnO <sub>2</sub> @Co <sub>9</sub> S <sub>8</sub> /NF       | -                               | 643.3 C g <sup>-1</sup>         | 3 mA cm <sup>-2</sup>         | 3 M KOH        | 120% (10000)         | [20]             |
| Co <sub>9</sub> S <sub>8</sub> @PPy@NiCo-LDH               | 2.65 F cm <sup>-2</sup>         | -                               | 1 mA cm <sup>-2</sup>         | 1 M LiOH       | 88.67% (10000)       | [21]             |
| <b>Co<sub>9</sub>S<sub>8</sub>@Ni-MoSe core-shell NWAs</b> | <b>0.93 mAh cm<sup>-2</sup></b> | <b>460.81mAh g<sup>-1</sup></b> | <b>1.5 mA cm<sup>-2</sup></b> | <b>2 M KOH</b> | <b>94.3% (10000)</b> | <b>This work</b> |

**Table S2.** ASCs device properties comparison with reported literature



| Reported ASC Device                                                                     | Energy density (Wh kg <sup>-1</sup> ) | Power density (W kg <sup>-1</sup> ) | Device Window (V) | Electrolyte     | Stability (Cycles)    | Ref.             |
|-----------------------------------------------------------------------------------------|---------------------------------------|-------------------------------------|-------------------|-----------------|-----------------------|------------------|
| NiCo <sub>2</sub> S <sub>4</sub> //G/C                                                  | 42.3                                  | 476                                 | 0-1.6             | 6 M KOH         | 78.6% (10000)         | [7]              |
| Ni-Co-S/G//PCNS                                                                         | 43.3                                  | 800                                 | 0-1.6             | 6 M KOH         | 85% (10000)           | [6]              |
| FeCo <sub>2</sub> S <sub>4</sub> //3D PNG                                               | 76.1                                  | 755                                 | 0-1.6             | KOH/PVA         | 82% (10000)           | [23]             |
| CoMoS <sub>4</sub> //rGO                                                                | 27.2                                  | 400                                 | 0-1.6             | 1 M KOH         | 86% (10000)           | [22]             |
| CoSe <sub>2</sub> /MoSe <sub>2</sub> -3-1//AC                                           | 51.84                                 | 799.2                               | 0-1.6             | 3 M KOH         | 93.4% (10000)         | [14]             |
| MoSe <sub>2</sub> -Ni(OH) <sub>2</sub> //AC                                             | 43                                    | 817                                 | 0-1.6             | 6 M KOH         | 85% (5000)            | [13]             |
| E-CoSe <sub>2</sub> /Ni <sub>0.85</sub> Se//AC                                          | 40.5                                  | 538                                 | 0-1.6             | 6 M KOH         | 82% (5000)            | [12]             |
| NiSe@MoSe <sub>2</sub> //N-PMCN                                                         | 32.6                                  | 415                                 | 0-1.65            | 2M KOH          | 91.4% (5000)          | [11]             |
| CoSe//AC                                                                                | 18.6                                  | 750                                 | 0-1.5             | 2M KOH          | 95.4% (20000)         | [10]             |
| Co-Mo-Se//AC                                                                            | 44.7                                  | 1094                                | 0-1.55            | KOH/PVA         | 90.7% (8000)          | [15]             |
| MnO <sub>2</sub> @Co <sub>9</sub> S <sub>8</sub> //AC                                   | 35                                    | 240                                 | 0-1.6             | 3M KOH          | 97.5% (36000)         | [20]             |
| <b>Co<sub>9</sub>S<sub>8</sub>@Ni-MoSe //Fe<sub>2</sub>O<sub>3</sub>@PAN NFs@ N-rGO</b> | <b>96.9</b>                           | <b>1158</b>                         | <b>0-1.7</b>      | <b>PVA/ KOH</b> | <b>94.47% (10000)</b> | <b>This work</b> |

## Reference

- [1] J. Balamurugan, T. D. Thanh, N. H. Kim, J. H. Lee, Adv. Mater. Interfaces, 2016, **3**, 1500348.
- [2] Y. Ruan, L.Lv , Z. Li , C. Wang and J. Jiang, 2017, **9**, 18032.
- [3] J. Balamurugan, C. Li, V. Aravindan, N. H. Kim, and J.H. Lee, Adv. Funct. Mater., 2018, **28**, 1803287.

- [4] Y. Al Haj, J. Balamurugan, N. H. Kim and J. H. Lee, *J. Mater. Chem. A*, 2019, **7**, 3941
- [5] M. Guo, J. Balamurugan, T. D. Thanh, N. H. Kim and J. H. Lee, *J. Mater. Chem. A*, 2016, **4**, 17560
- [6] G. J. He, M. Qiao, W. Y. Li, Y. Lu, T. T. Zhao, R. J. Zou, B. Li, J. A. Darr, J. Q. Hu, M. M. Titirici, I. P. Parkin, *Adv. Sci.*, 2017, **4**, 1600214.
- [7] J. Yang, C. Yu, X. Fan, S. Liang, S. Li, H. Huang, Z. Ling, C. Hao, J. Qiu, *Energy Environ. Sci.*, 2016, **9**, 1299.
- [8] Y.H. Liu, W.L. Li, X.W. Chang, H. Chen, X.L. Zheng, J.B. Bai, Z.Y. Ren, *J. Colloid Interface Sci.*, 2020, **562**, 483-492.
- [9] B. Kirubasankar, S. Vijayan, S. Angaiah, *Sustainable Energy Fuels*, 2019, **3**,467-477.
- [10] Y.R. Zhu, Z.D. Huang, Z.L. Hu, L.J. Xi, X.B. Ji, Y. Liu, *Electrochim. Acta*, 2018, **269**,30-37.
- [11] H. Peng, J.Z. Zhou, K.J. Sun, G.F. Ma, Z.G. Zhang, E. Feng, Z.Q. Lei, *ACS Sustainable Chem. Eng.*, 2017, **5**, 5951-5963.
- [12] J.H. Lin, H.H. Wang, Y.T. Yan, X.H. Zheng, H.N. Jia, J.L. Qi, J. Cao, J.C. Tu, W.D. Fei, J.C. Feng, *J. Mater. Chem. A*, 2018, **6**, 19151-19158.
- [13] B. Kirubasankar, P. Palanisamy, S. Arunachalam, V. Murugadoss, S. Angaiah, *Chem. Eng. J.*, 2019, **355**, 881-890.
- [14] F. Ma, J. Lu, L. Pu, W. Wang, Y. Dai, *J. Colloid Interface Sci.*,2020, **563**, 435-446.
- [15] C. Miao, C. Zhou, H. Wang, K. Zhu, K. Ye, Q. Wang, J. Yan, D. Cao, N. Li, G. Wang, *J. Power Sources* 2021, **490**, 229532
- [16] J. Ren, M. Shen, Z.Li, C. Yang, Y. Liang, H.Wang, J. Li, N. Li, D. Qian, *J. Power Sources* 2021, **501**, 230003;

- [17] Y. Liu , G. Liu , X. Nie , A. Pan, S. Liang, and T. Zhu, *J. Mater. Chem. A*, 2019, **7**, 11044-11052
- [18] J. Zhu, D. Song, T. Pu, J. Li, B. Huang, W. Wang, C. Zhao, L. Xie, L. Chen, *Chem. Eng. J.*, 2018, **336**, 679-689
- [19] W. Xiong, K. Hu, Z. Li, Y. Jiang, Z. Li, Z. Li, X. Wang, *Nano Energy*, 2019, **66**, 104149.
- [20] Q. Hu, X. Jiang, M. He, Q. Zheng, K. H. Lam, D. Lin, *Electrochim. Acta*, 2020, **338**, 135896.
- [21] L. Wang, S. Li, F. Huang, X. Yu, M. Liu, H. Zhang, *J. Power Sources*, 2019, **439**, 227103.
- [22] X. Y. Xu, Y. H. Song, R. N. Xue, J. K. Zhou, J. P. Gao, and F. B. Xing, *Chemical. Engineering Journal*, 2016, **301**, 266.
- [23] S. Tang, B. Zhu, X. Shi, J. Wu, and X. Meng, *Adv. Energy Mater.*, 2017, **7**, 1601985.
